# Supplementary material
Source: PubMed Central journal article supplement (PMC10171454)
Supplement: NIHMS1880976-supplement-321693_Major_Resources_Table.pdf [file NIHMS1880976-supplement-321693_Major_Resources_Table.pdf]

## Major Resources Table

To allow validation and replication of experiments, all essential research materials listed in the Methods should be included in the Major Resources Table below. Authors are encouraged to use public repositories for protocols, data, code, and other materials and provide persistent identifiers and/or links to repositories when available. Authors may add or delete rows as needed.

### Animals (in vivo studies)

| Species             | Vendor or Source | Background Strain | Sex    | Persistent ID / URL |
|---------------------|------------------|-------------------|--------|---------------------|
| Sprague-Dawley (SD) | Envigo           | Hsd               | Female | RRID:RGD_737903     |
| Sprague-Dawley (SD) | Envigo           | Hsd               | Male   | RRID:RGD_737903     |

### Genetically Modified Animals

|                 | Species | Vendor or Source | Background Strain | Other Information | Persistent ID / URL |
|-----------------|---------|------------------|-------------------|-------------------|---------------------|
| Parent - Male   |         |                  |                   |                   |                     |
| Parent - Female |         |                  |                   |                   |                     |

### Antibodies

| Target antigen                                               | Vendor or Source     | Catalog # | Working concentration | Lot # (preferred but not required) | Persistent ID / URL |
|--------------------------------------------------------------|----------------------|-----------|-----------------------|------------------------------------|---------------------|
| Phospho-Src Family (Tyr416) (D49G4)                          | Cell Signaling       | 6943      | 1:1,000               |                                    | AB_10013641         |
| Src (36D10)                                                  | Cell Signaling       | 2109      | 1:1,000               |                                    | AB_2106059          |
| Phospho-p44/42 MAPK (ERK 1/2) (Thr202/Tyr204) (D13.14.4E) XP | Cell Signaling       | 4370      | 1:1,000               |                                    | AB_2315112          |
| P44/42 MAPK (ERK 1/2) (137F5)                                | Cell Signaling       | 4695      | 1:1,000               |                                    | AB_390779           |
| $\beta$ -Tubulin clone AA2                                   | Millipore            | 05-661    | 1:1,000               |                                    | AB_309885           |
| Anti-rabbit HRP conjugated secondary                         | GE Healthcare/Cytiva | NA934     | 1:2,500               |                                    | AB_772206           |
| Anti-mouse HRP conjugated secondary                          | GE Healthcare/Cytiva | NA931     | 1:2,500               |                                    | AB_772210           |
| Streptavidin Alexa Fluor 488                                 | Invitrogen           | S32354    | 1:2,000               |                                    | AB_2315383          |
|                                                              |                      |           |                       |                                    |                     |

### DNA/cDNA Clones

| Clone Name | Sequence | Source / Repository | Persistent ID / URL |
|------------|----------|---------------------|---------------------|
|            |          |                     |                     |

### Cultured Cells

| Name                                                                                          | Vendor or Source | Sex (F, M, or unknown) | Persistent ID / URL |
|-----------------------------------------------------------------------------------------------|------------------|------------------------|---------------------|
| SV40 Large T-Antigen Immortalized Wistar Kyoto (WKY) Renal Proximal Tubule Cells (Passage 23) | Ulrich Hopfer    | male                   |                     |

### Data & Code Availability

DOI [to be added]

| Description | Source / Repository | Persistent ID / URL |
|-------------|---------------------|---------------------|
|             |                     |                     |

## Other

| Description                                  | Source / Repository  | Persistent ID / URL |
|----------------------------------------------|----------------------|---------------------|
| Inactin                                      | Sigma                |                     |
| Ketaset (Ketamine Hydrochloride)             | Zoetis Inc.          |                     |
| AnaSed (Xylazine Hydrochloride)              | Akorn, Inc.          |                     |
| cGMP                                         | Biolog or Sigma      |                     |
| 8-Biotin-11-cGMP                             | Biolog               |                     |
| 4-N <sub>3</sub> -PET-8-Biotin-11-cGMP       | Biolog               |                     |
| 8-Biotin-11-cAMP                             | Biolog               |                     |
| 8-N <sub>3</sub> -6-Biotin-10-cAMP           | Biolog               |                     |
| Rostafuroxin                                 | Dr. Patrizia Ferrari |                     |
| Oubain                                       | Sigma                |                     |
| Bodipy-Ouabain                               | Invitrogen           |                     |
| Fenoldopam                                   | Sigma                |                     |
| SBFI                                         | Molecular Probes     |                     |
| Mammalian Protein Extraction Reagent         | Thermo Scientific    |                     |
| Halt Protease and Phosphatase Inhibitor      | Thermo Scientific    |                     |
| Restore Western Blot Stripping Buffer        | Thermo Scientific    |                     |
| Bicinchoninic Acid Assay (BCA)               | Pierce               |                     |
| TGX 10% Tris-HCl 18 Well Gels                | BioRad               |                     |
| 0.45 Micron Nitrocellulose                   | BioRad               |                     |
| ECL Prime Western Blotting Detection Reagent | GE Healthcare/Cytiva |                     |
| Opti-MEM Reduced Serum Medium                | Gibco                |                     |
| MyOne Streptavidin T1 Dynabeads              | Invitrogen           |                     |
