# Supplementary material
Source: PubMed Central journal article supplement (PMC10171454)

FIGURE 2

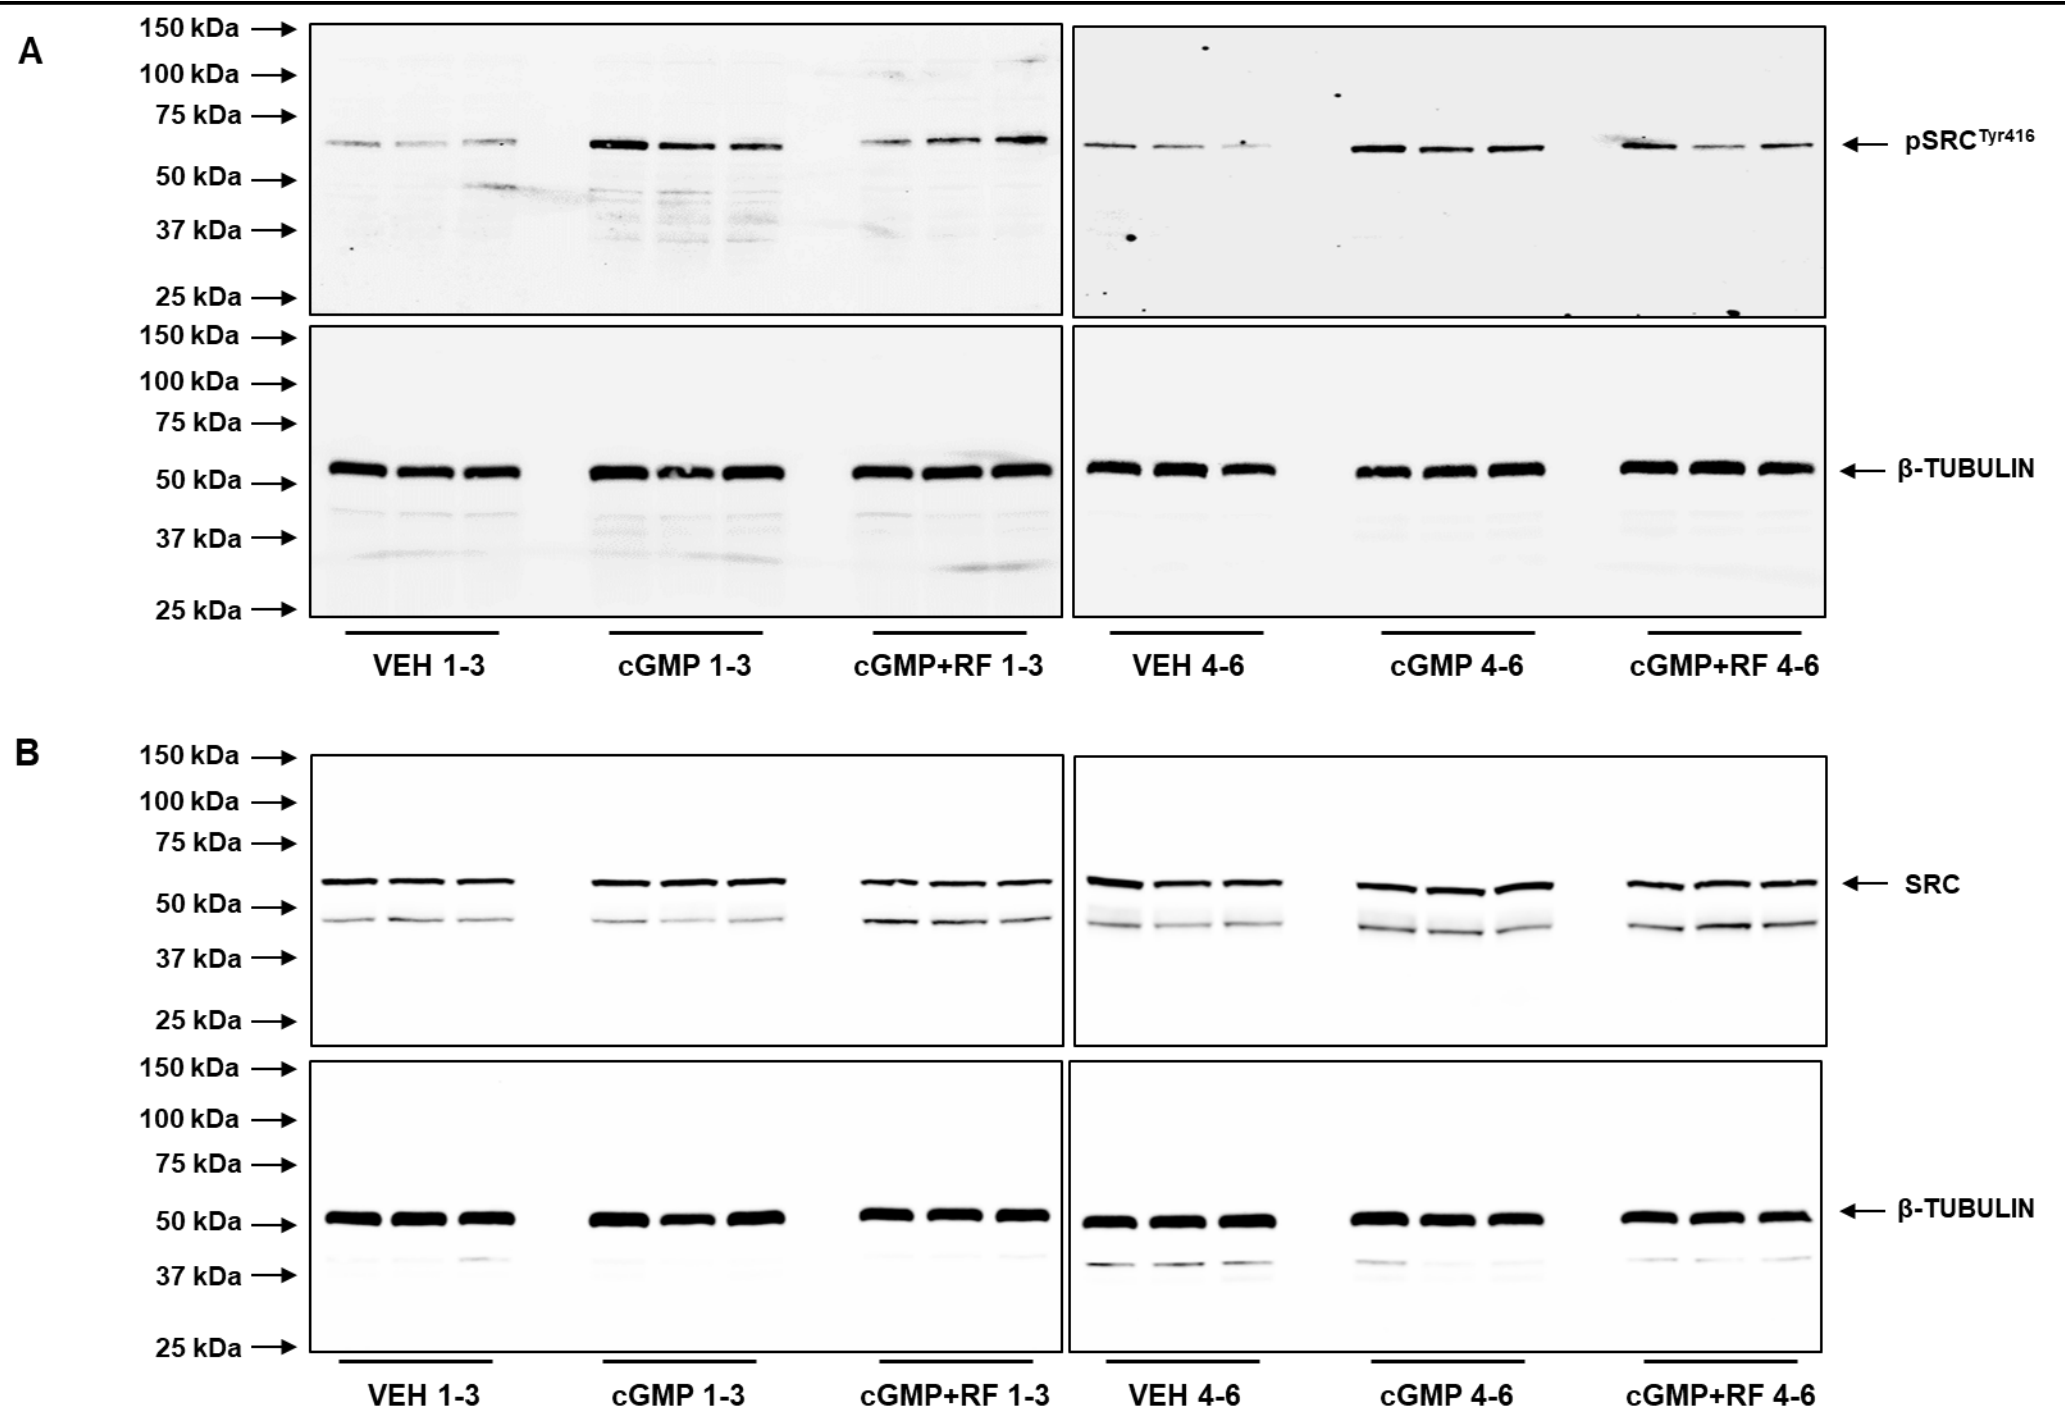

FIGURE 2

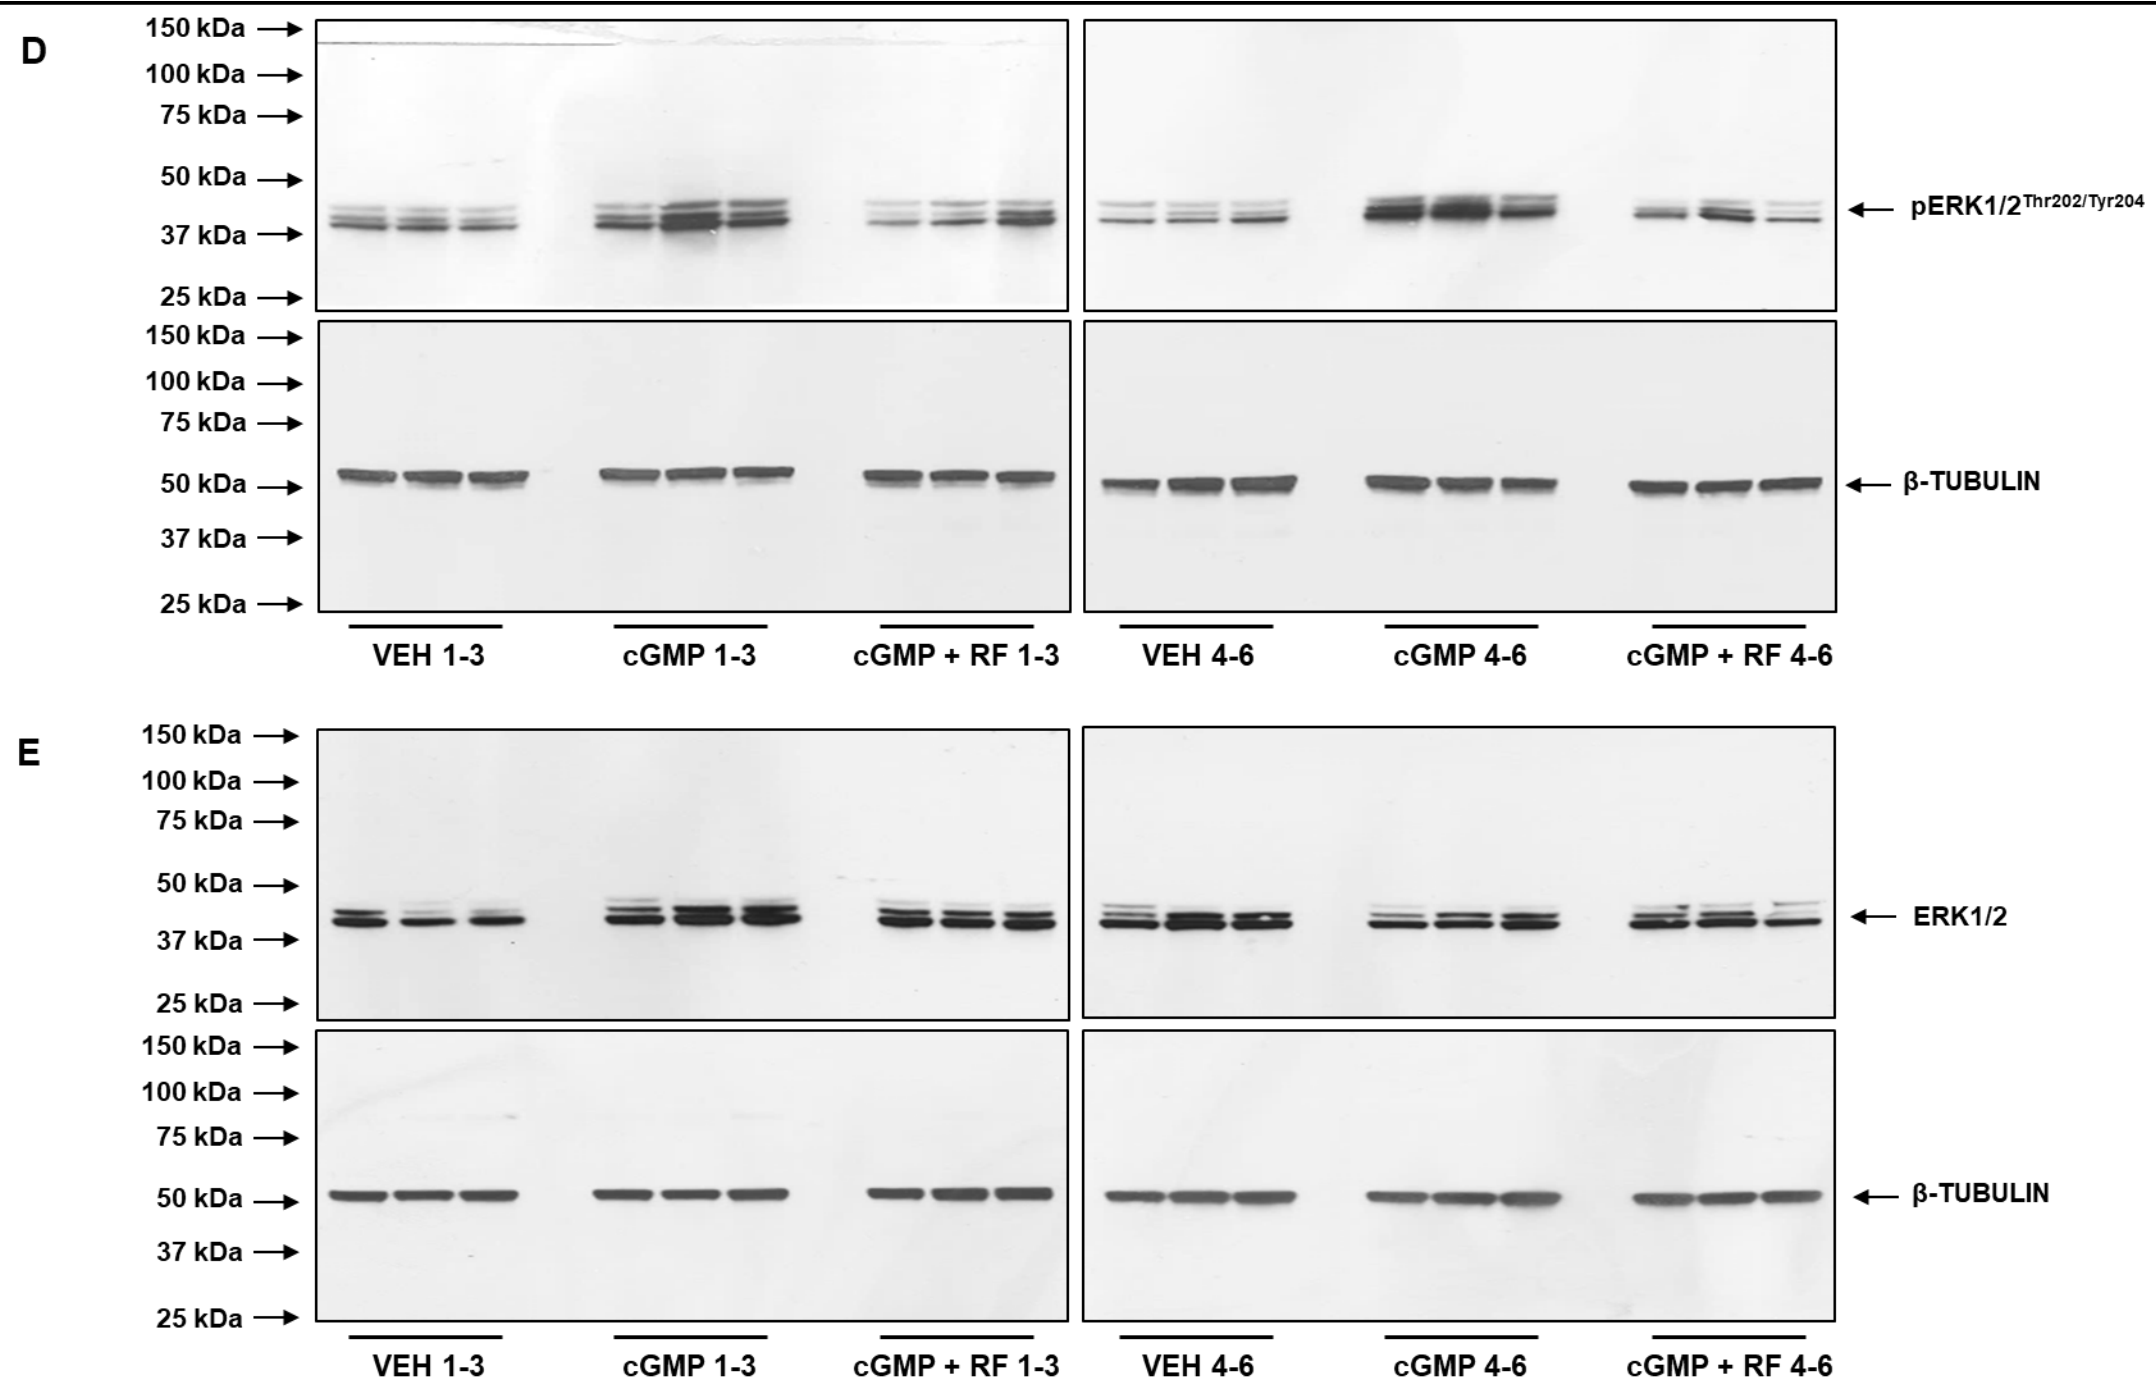

FIGURE 4

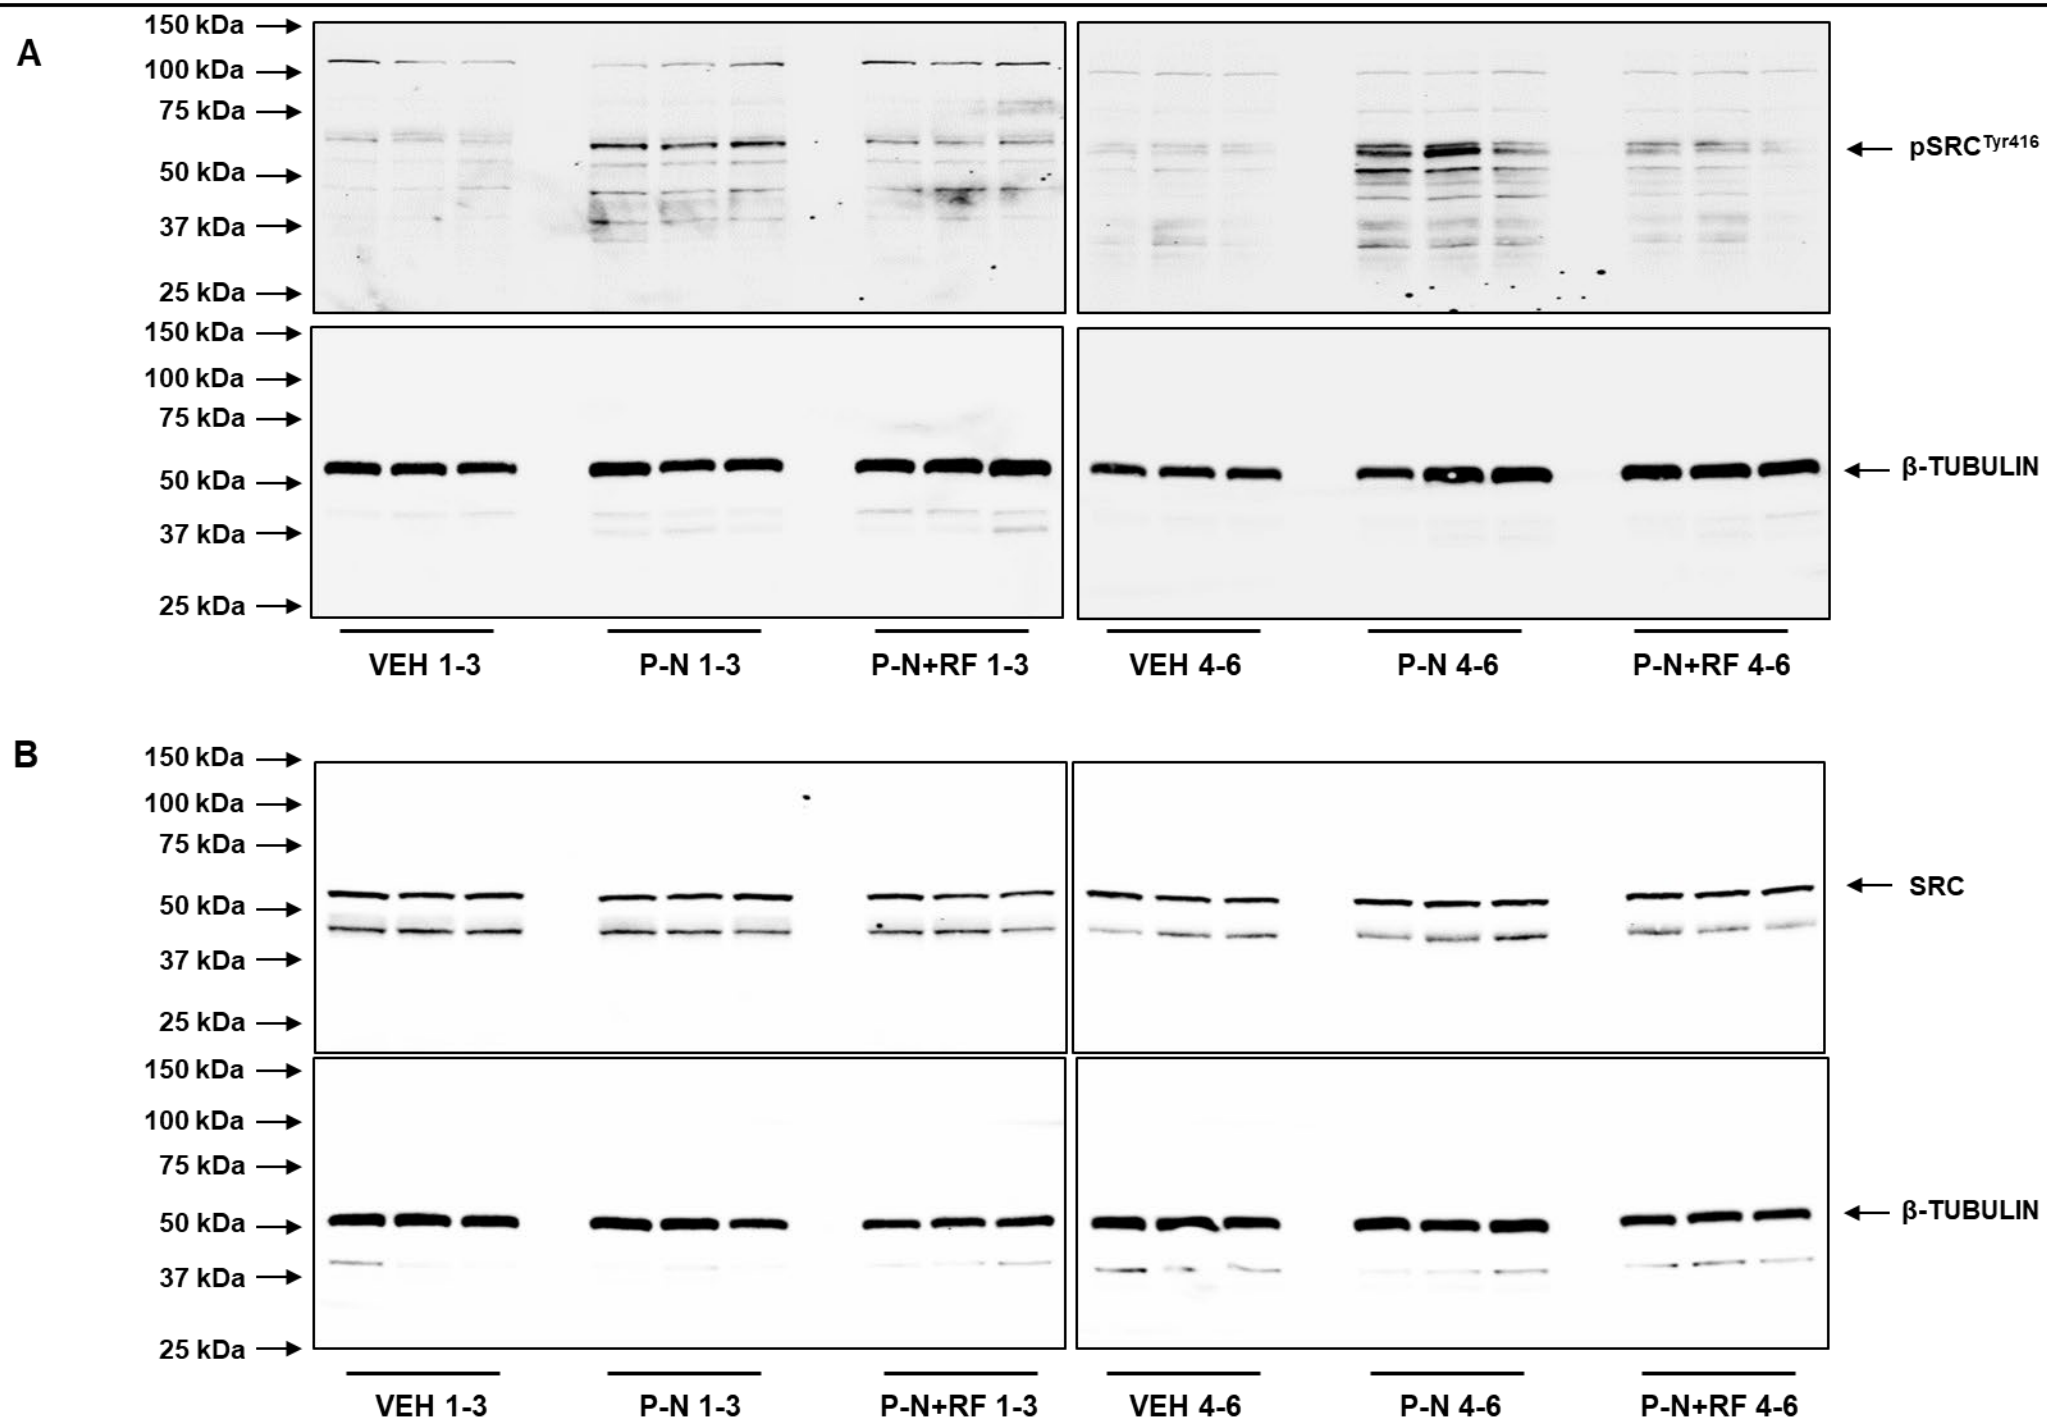

**D**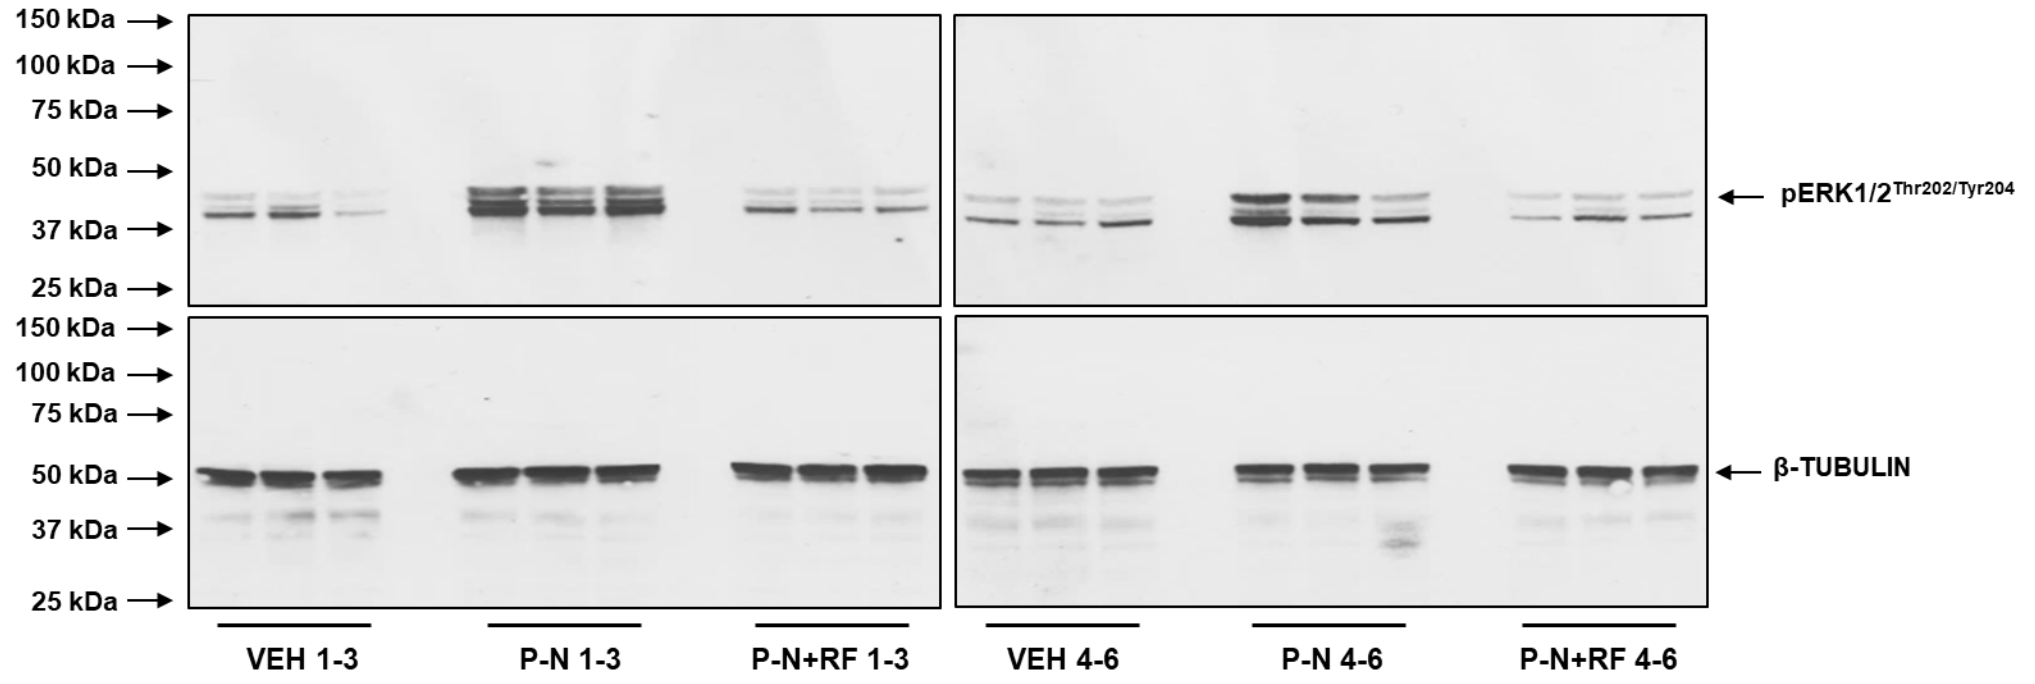**FIGURE 4****E**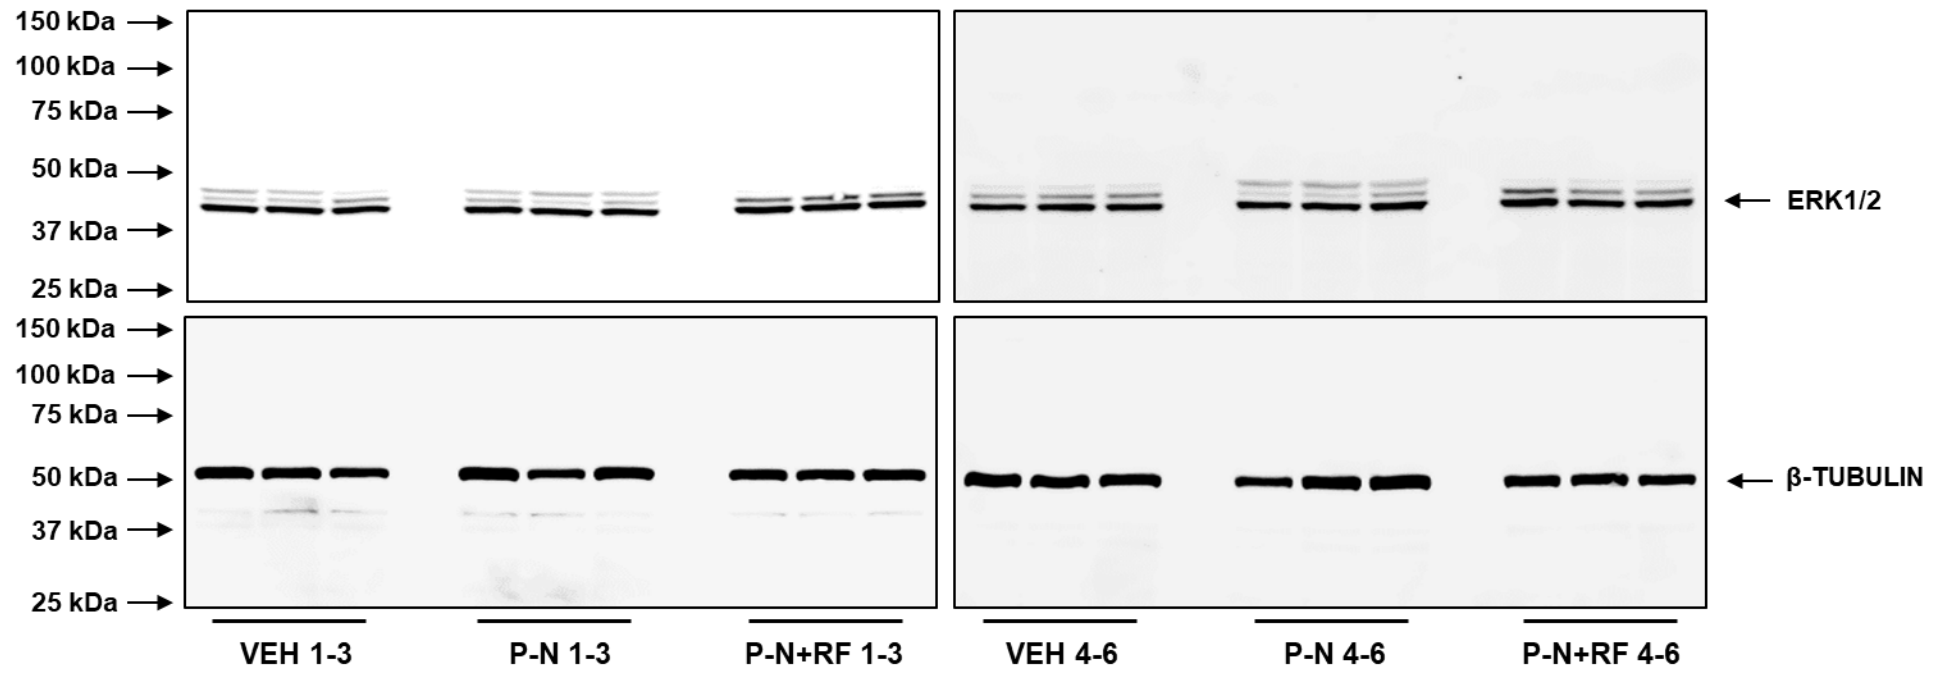

FIGURE 8

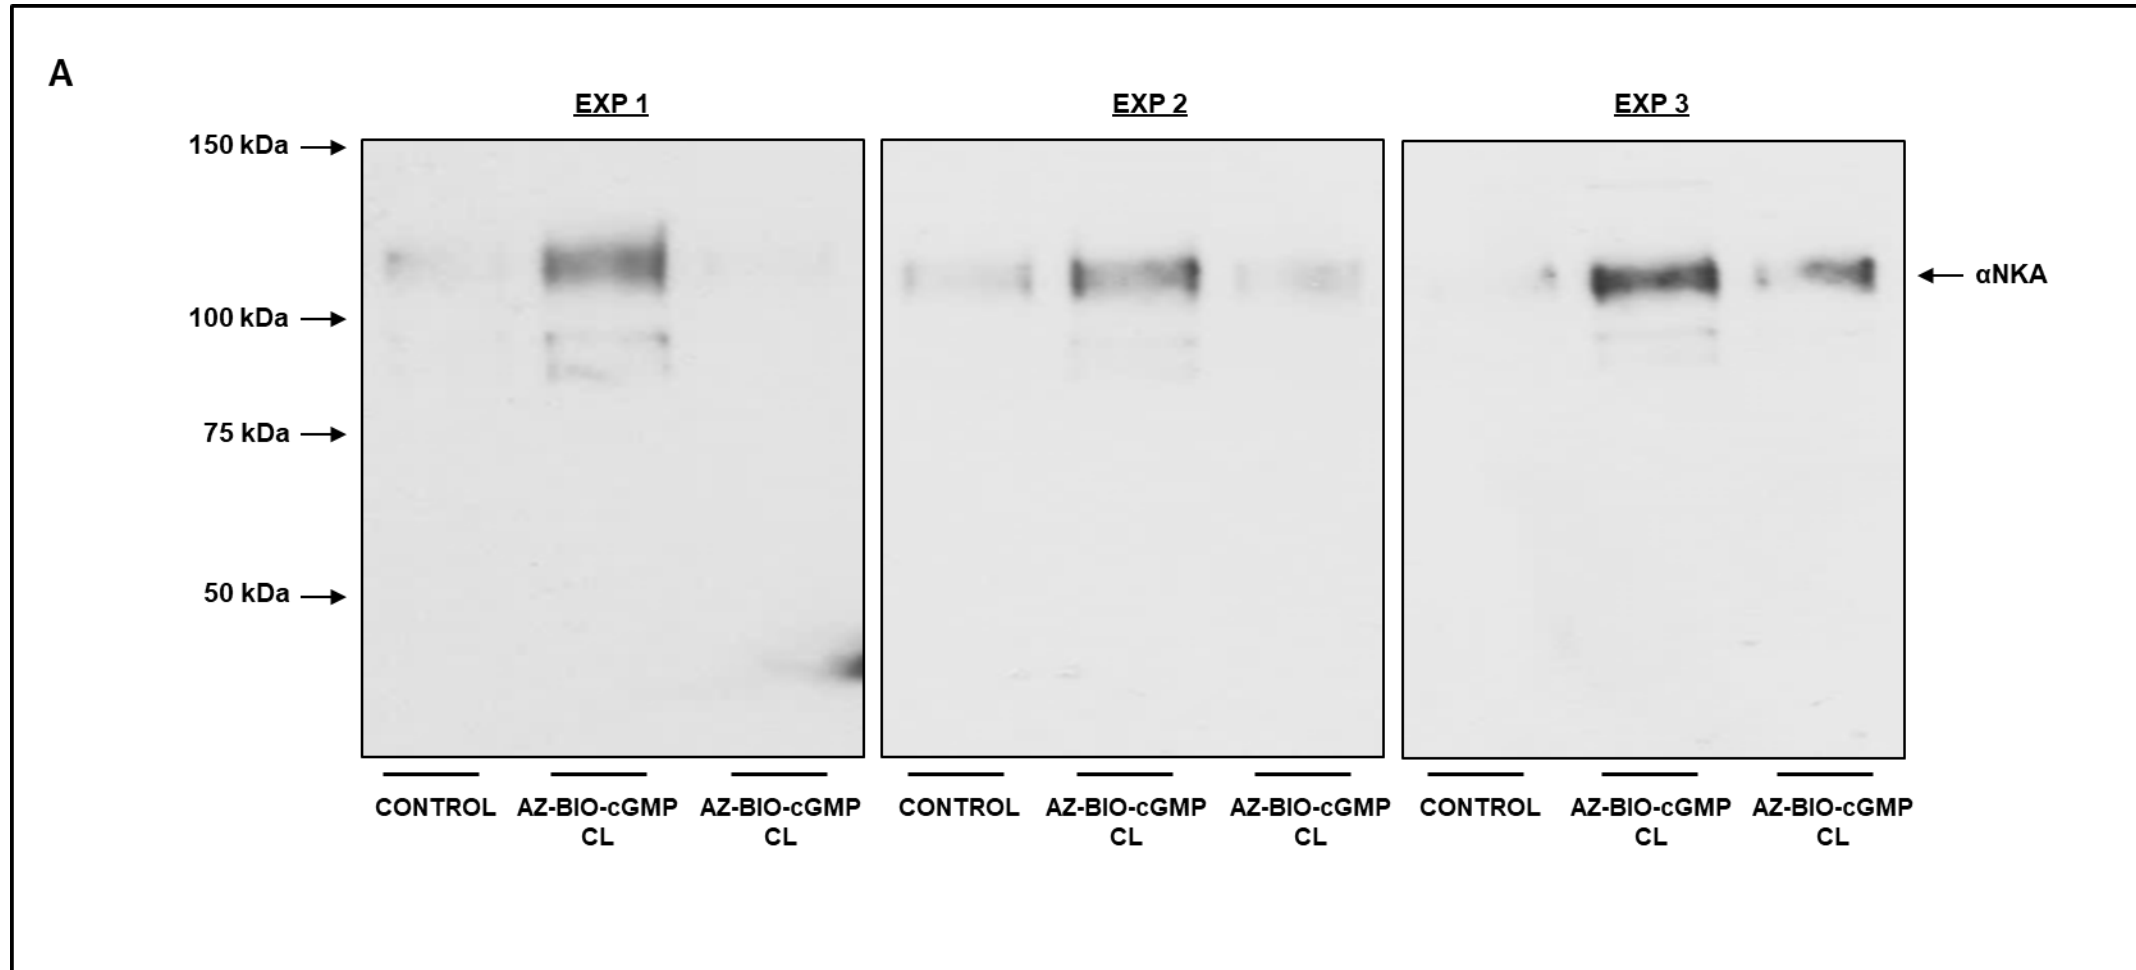

FIGURE 8

B

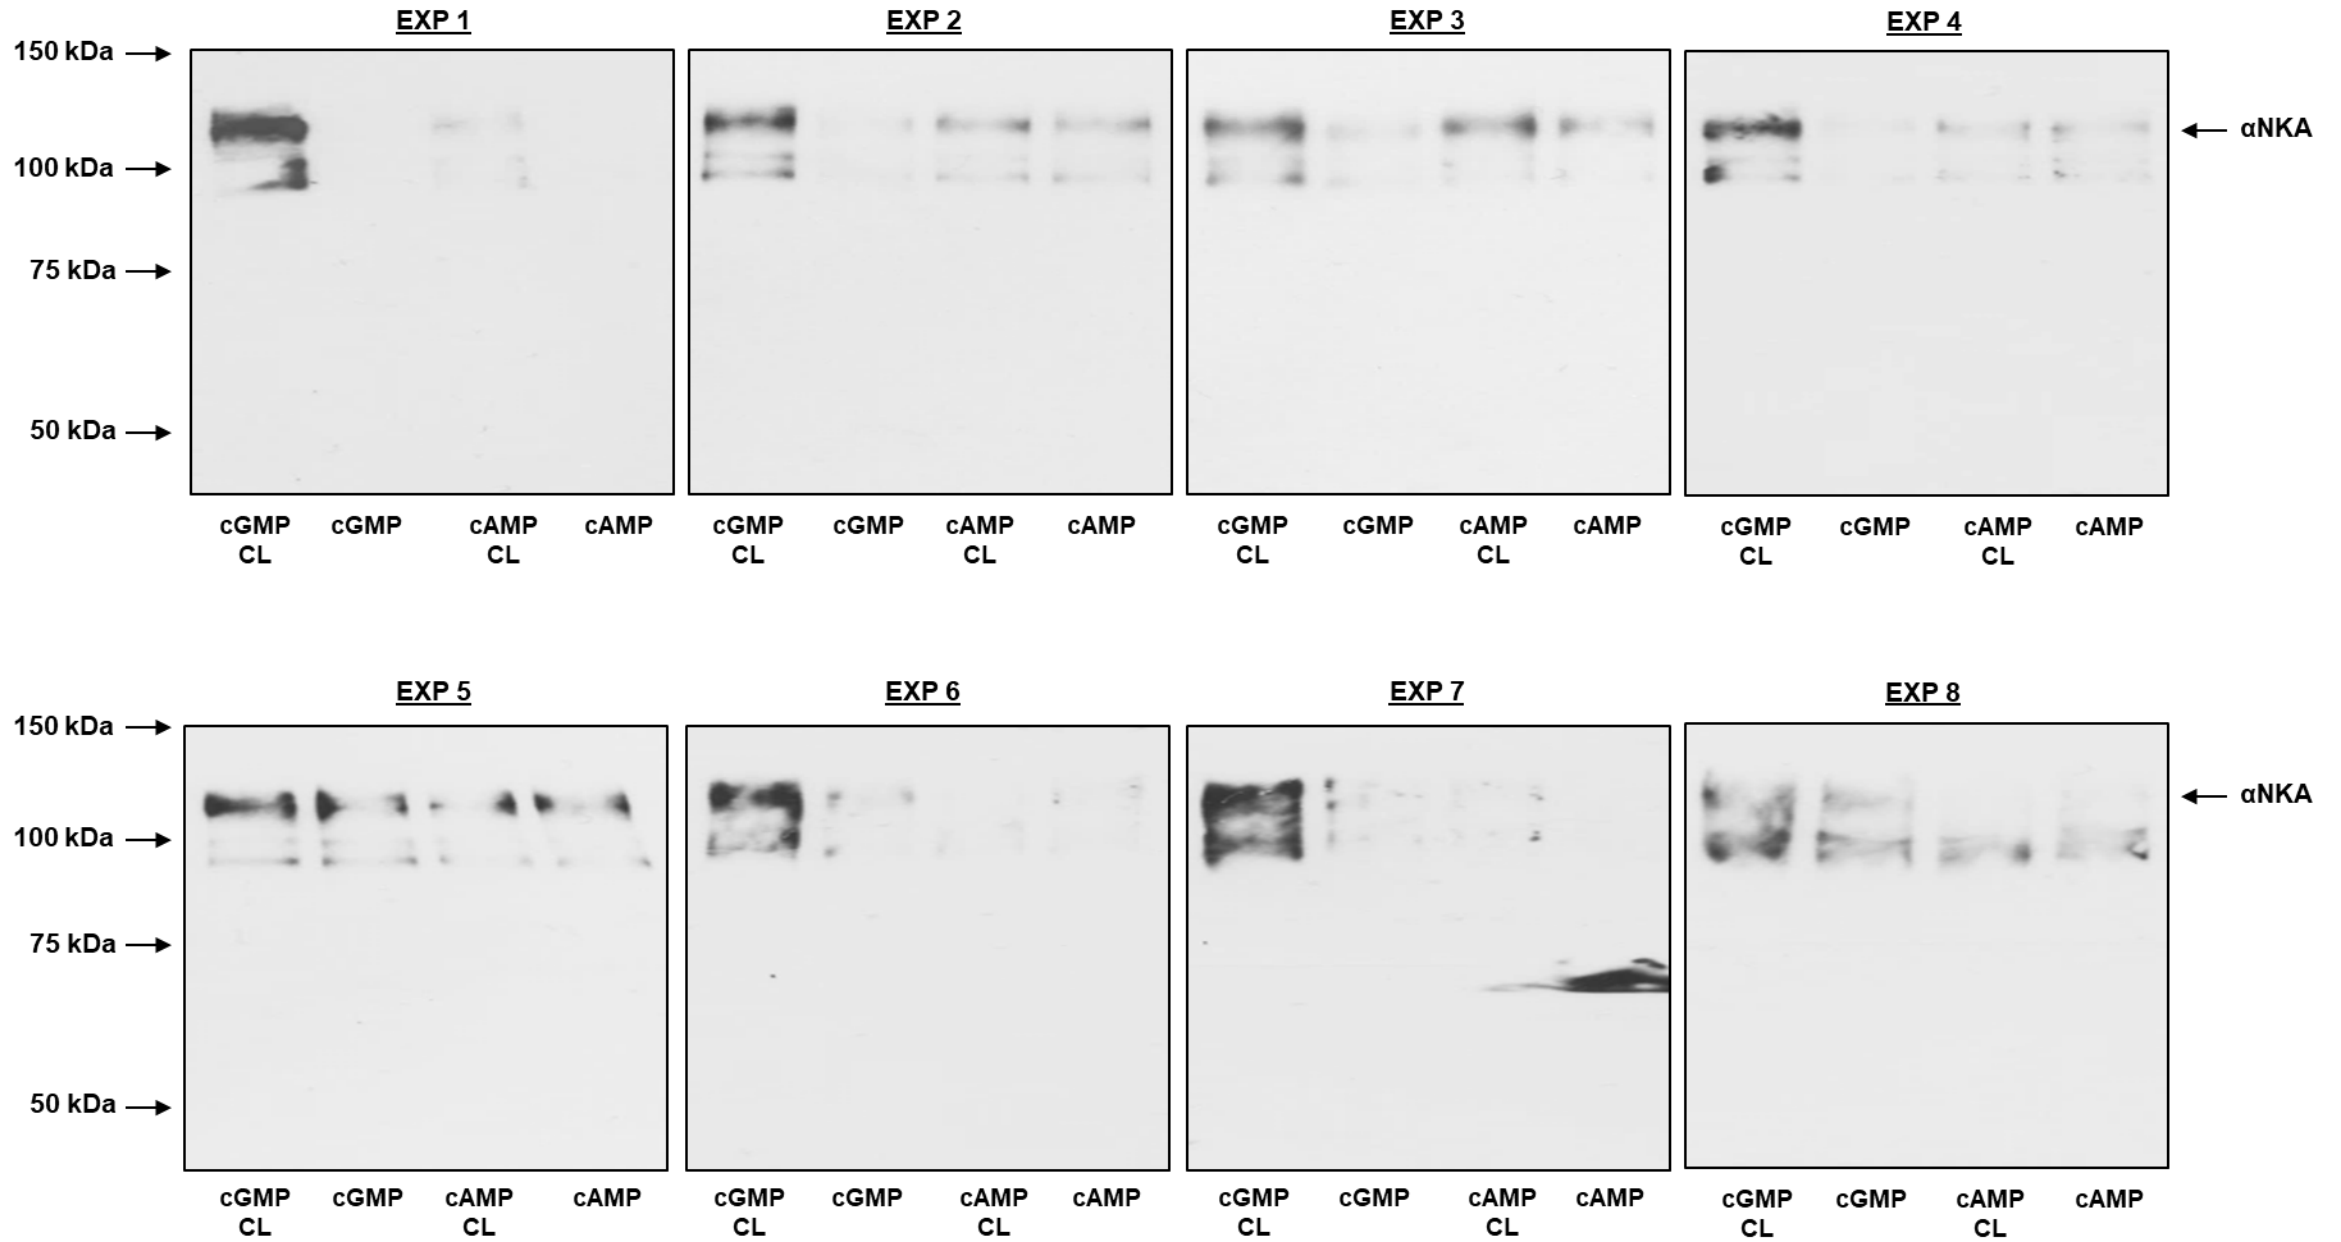

FIGURE 8

C

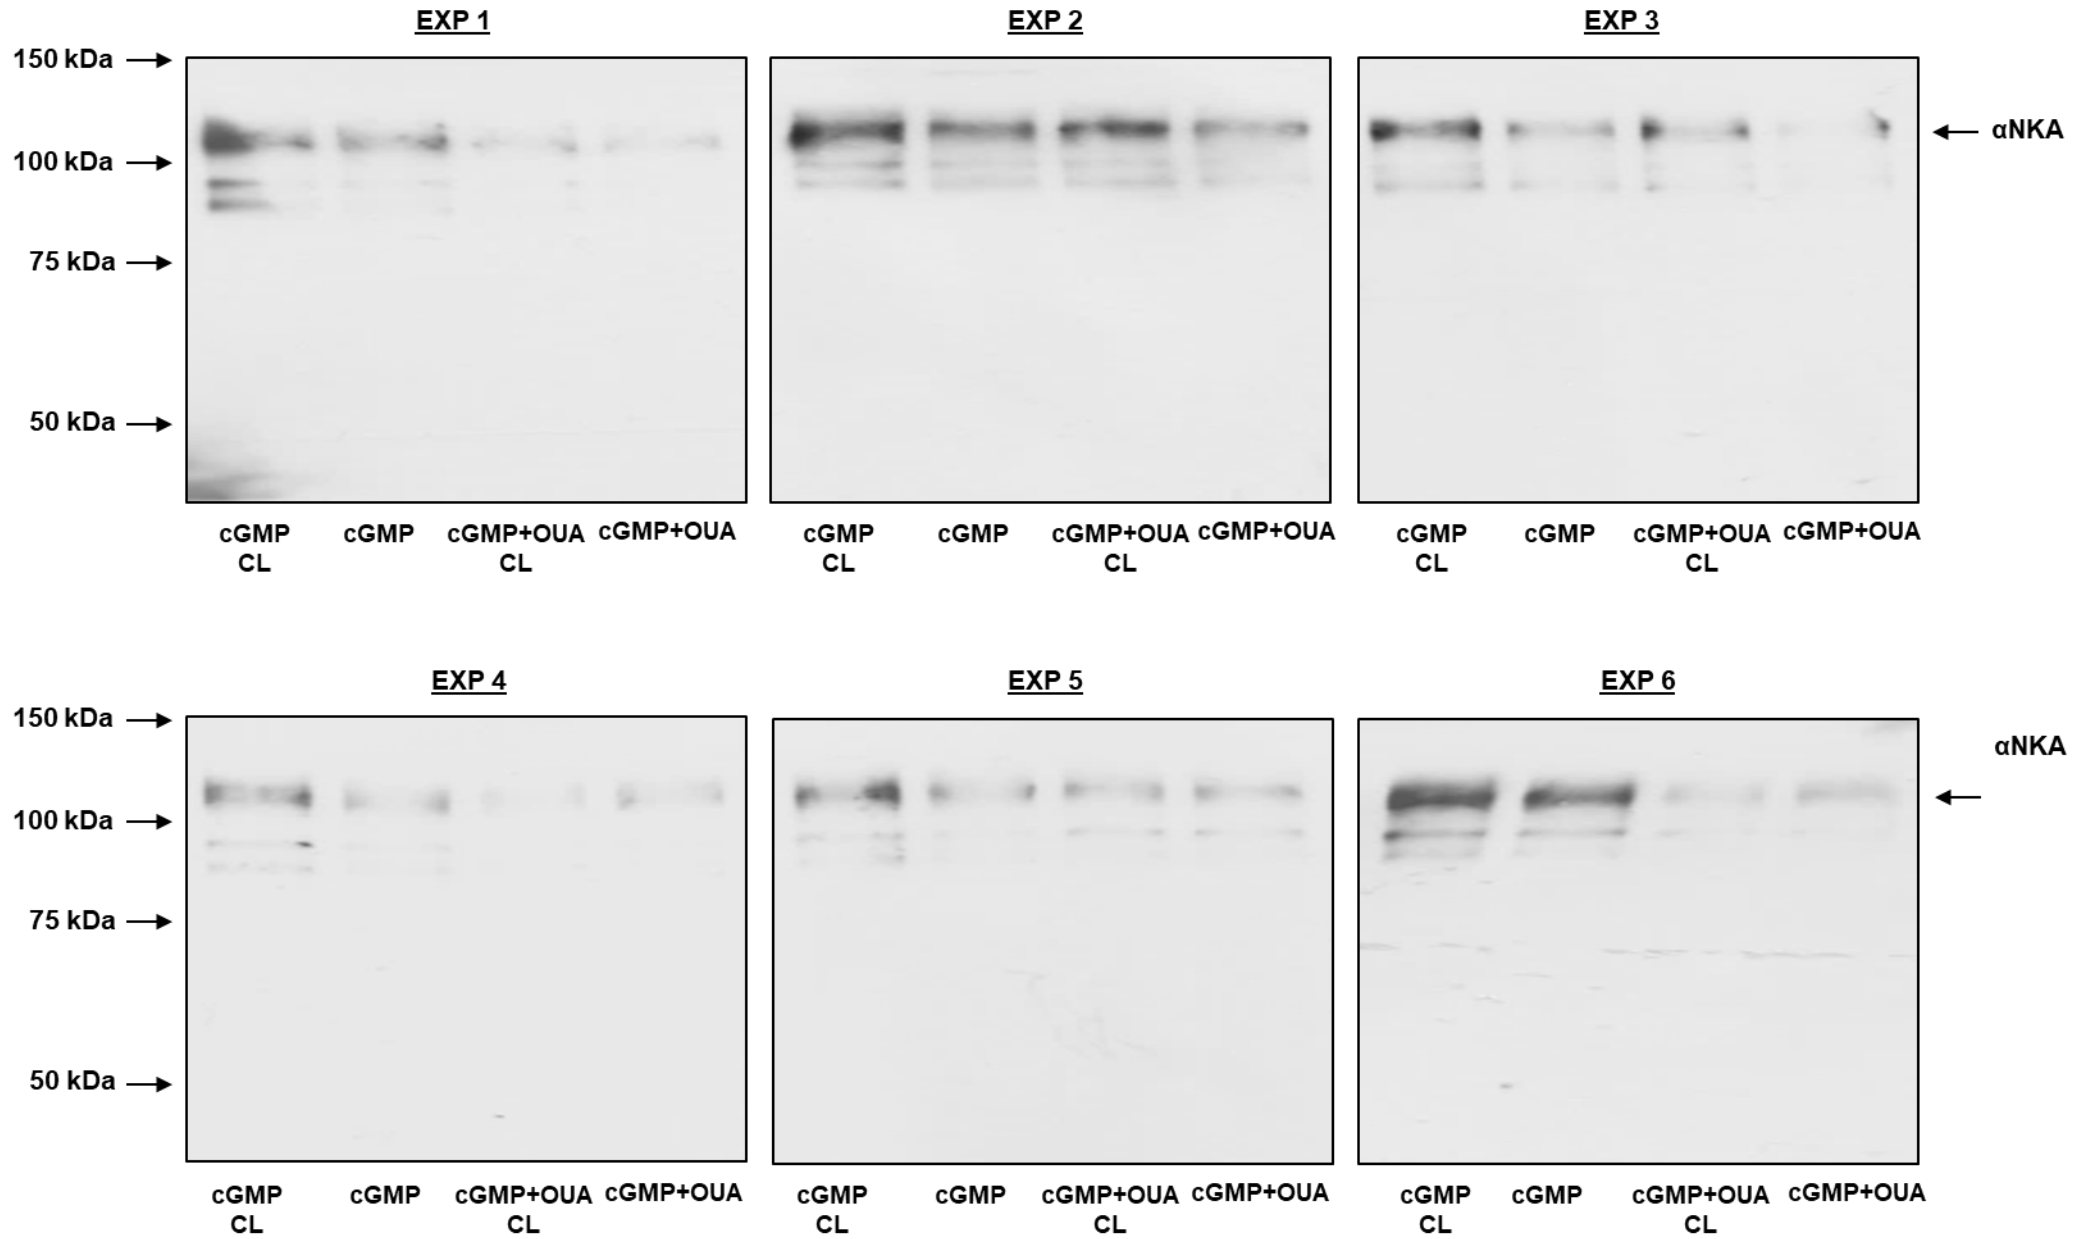

Supplement: NIHMS1880976-supplement-321693_Uncut_Gel_Blots.pdf [file NIHMS1880976-supplement-321693_Uncut_Gel_Blots.pdf]
